# Supplementary material
Source: ML conference proceedings conference paper supplement (https://openreview.net/forum?id=1g1zg2dgIH)

**corr=0.121, p=0.054**

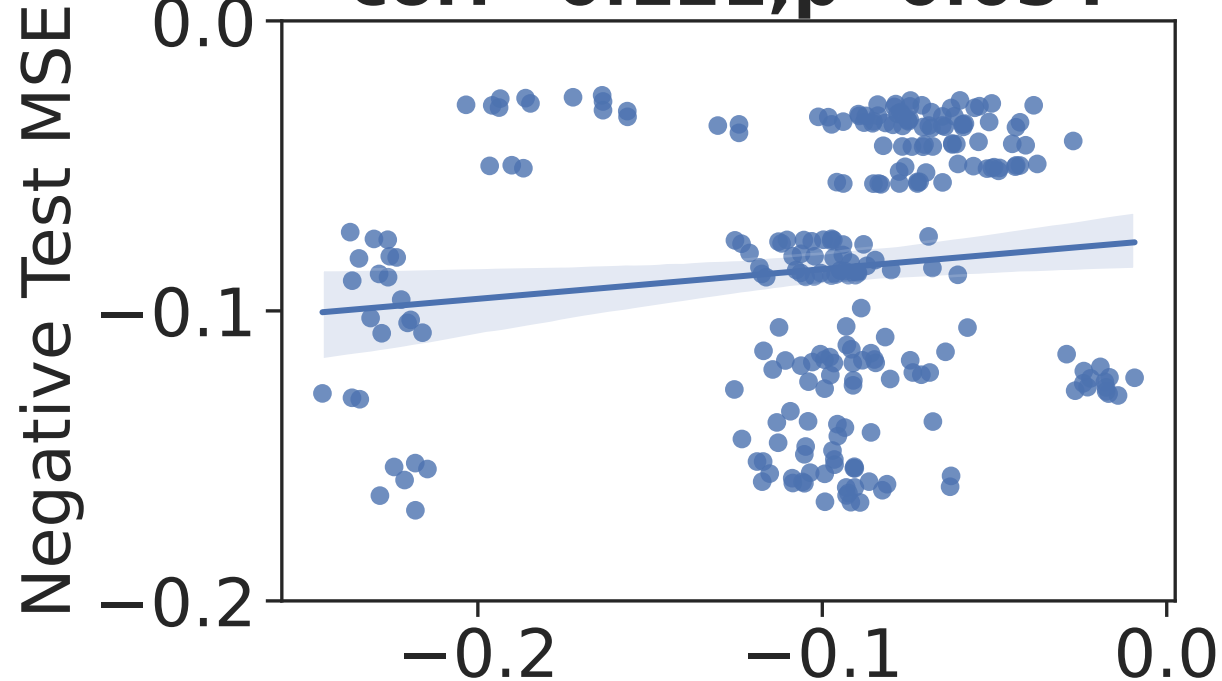

Supplement: supplementary_material [file attachment]

Transferred MSE

0.04

0.03

-0.32

-0.30

-0.28

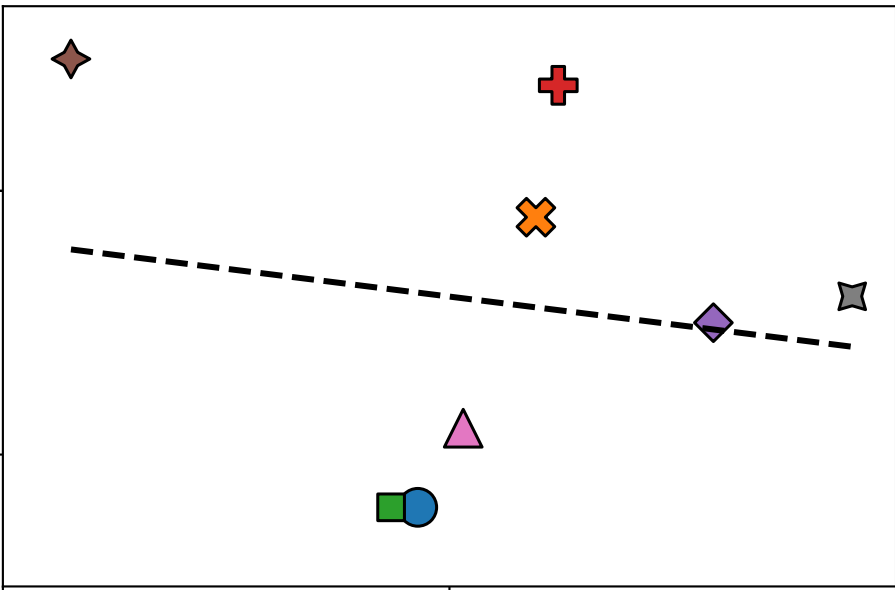

Supplement: supplementary_material [file attachment]

**corr=0.340, p<0.001**

Transferred MSE

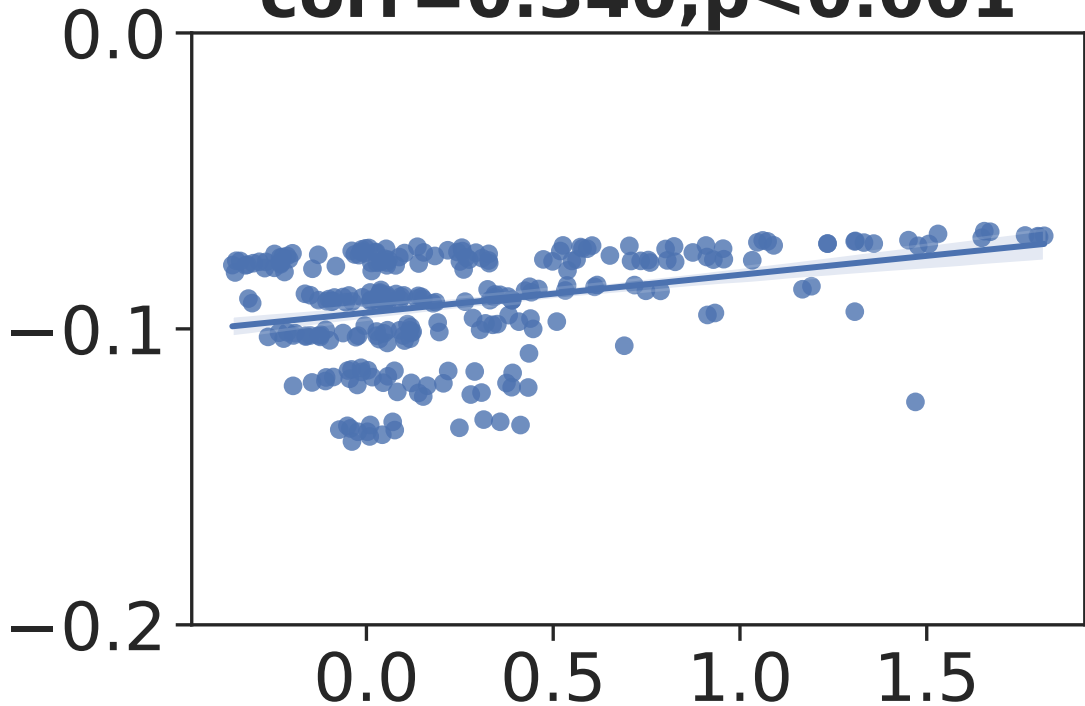

Supplement: supplementary_material [file attachment]

**corr=0.304, p<0.001**

Transferred MSE

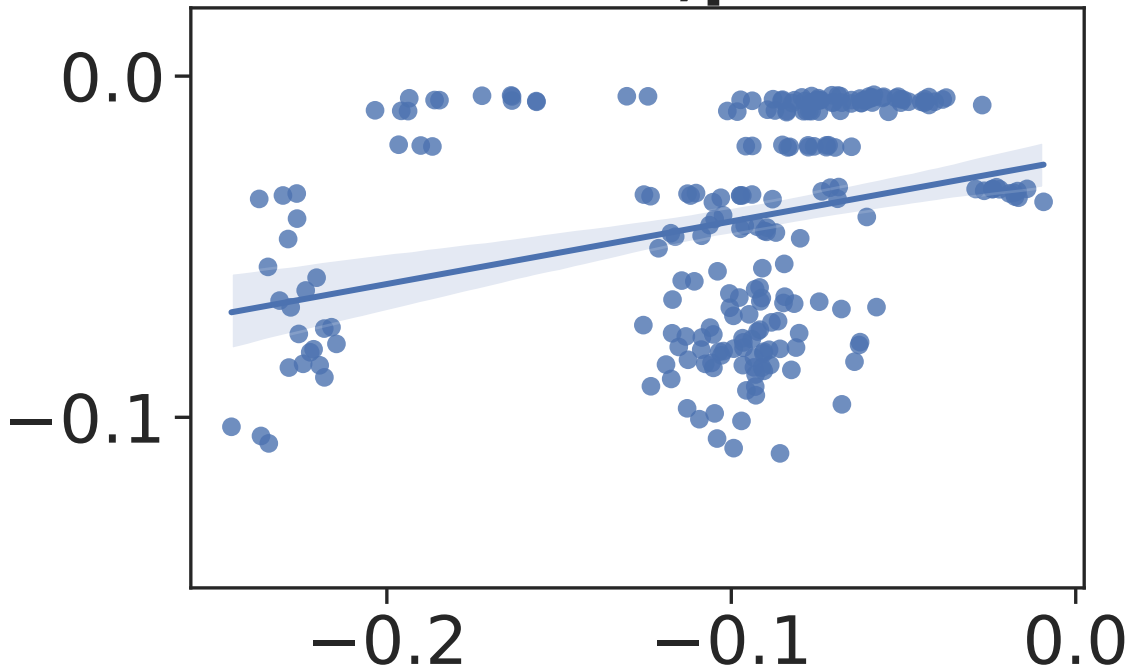

Supplement: supplementary_material [file attachment]

Negative Test MSE

**corr=0.392,  $p<0.001$**

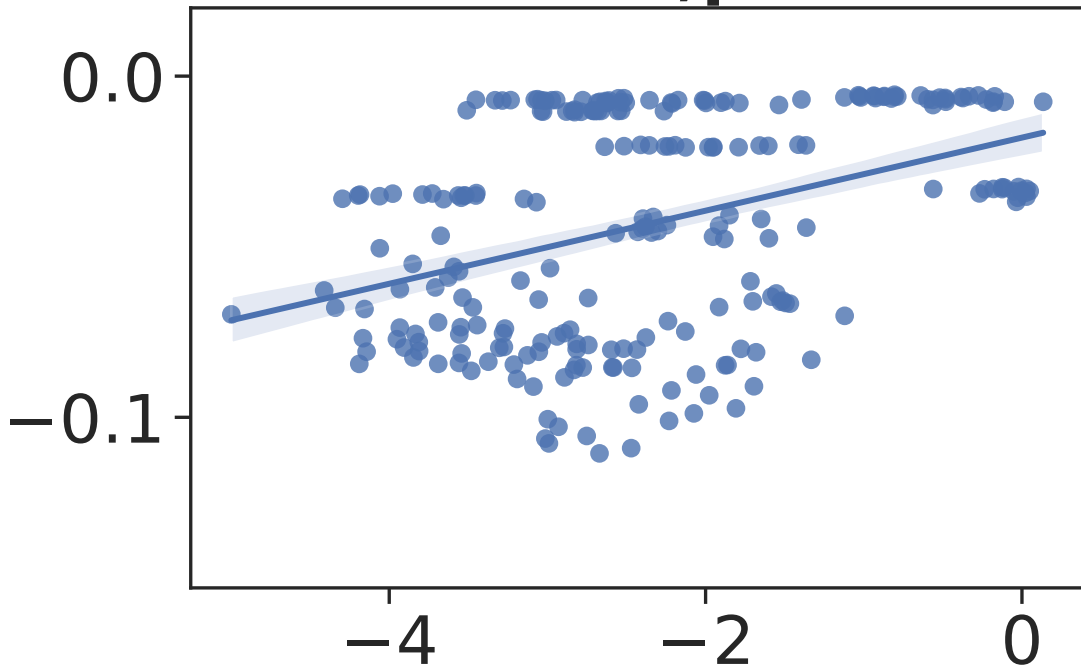

Supplement: supplementary_material [file attachment]

**corr=0.711, p<0.001**

Transferred MSE

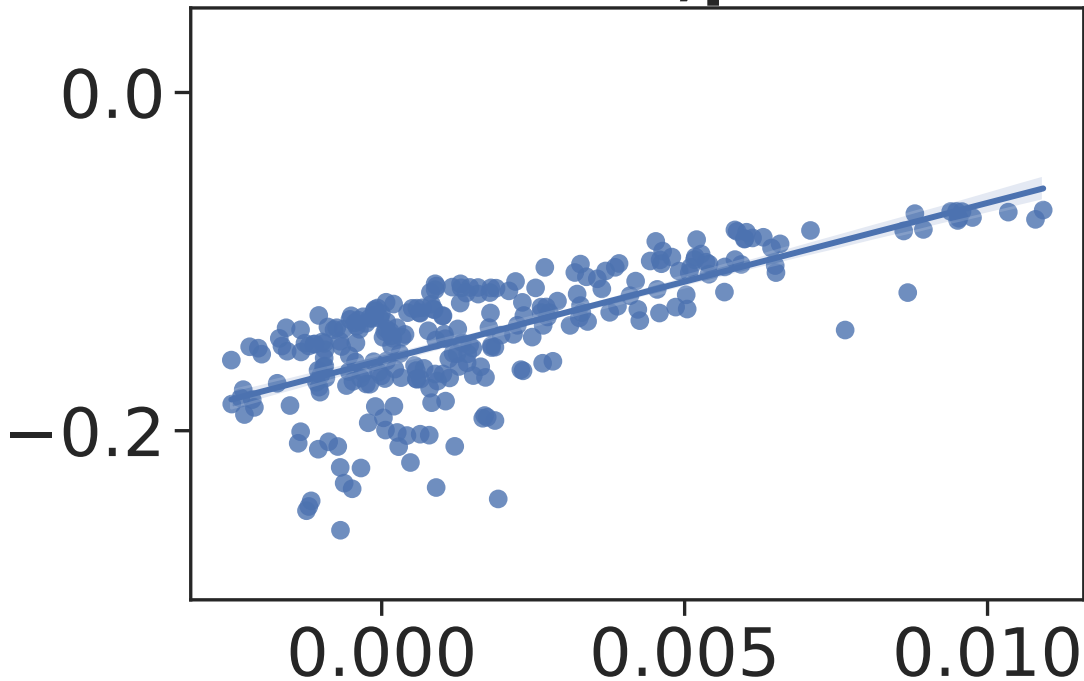

Supplement: supplementary_material [file attachment]

**corr=0.666, p<0.001**

Transferred MSE

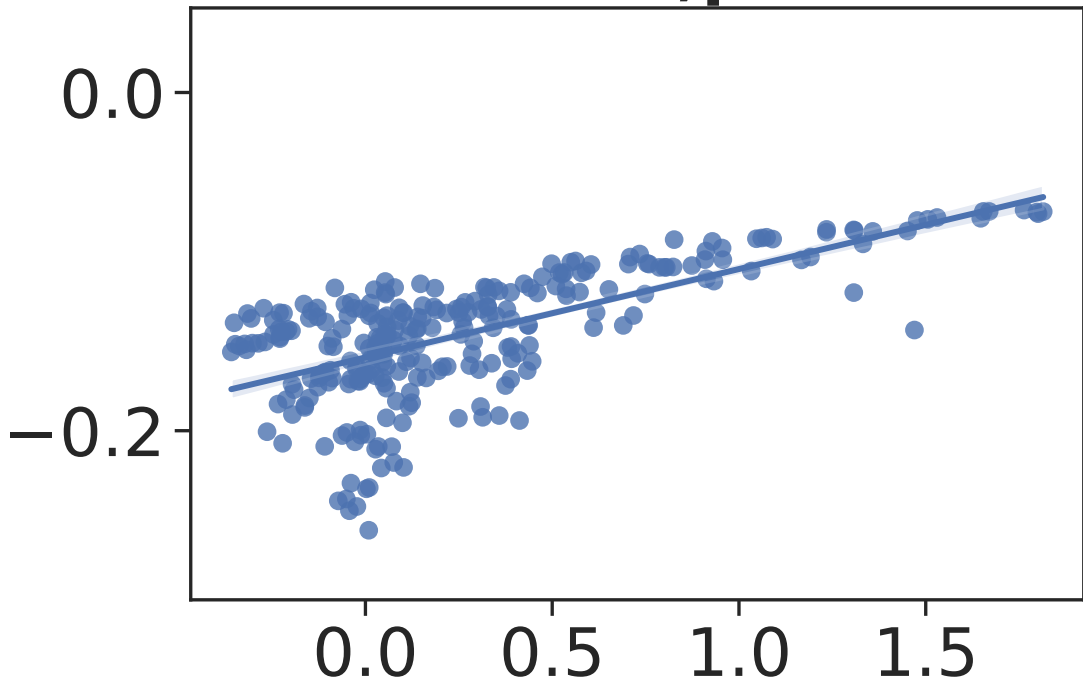

Supplement: supplementary_material [file attachment]

Transferred MSE

0.04

0.03

1.27

1.59

1.91

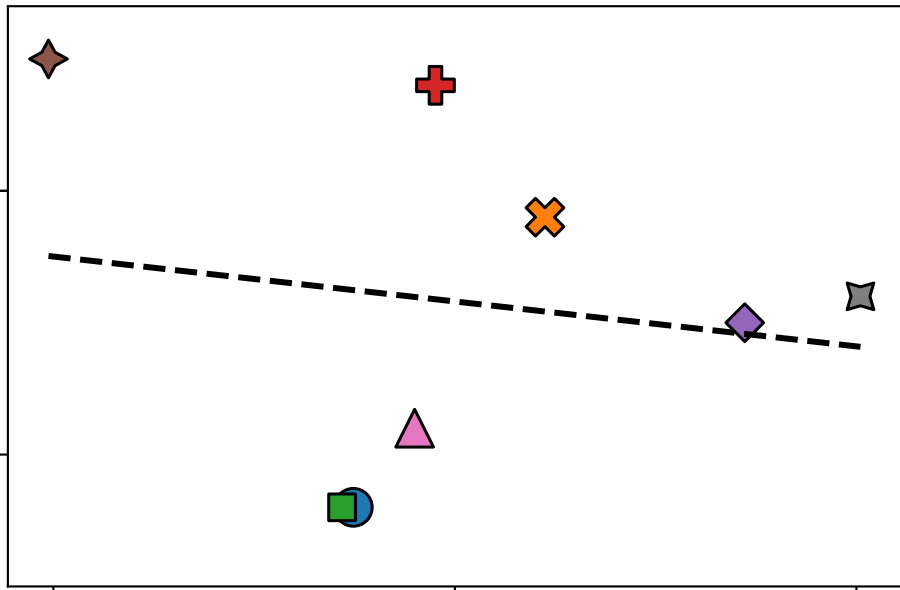

Supplement: supplementary_material [file attachment]

Method

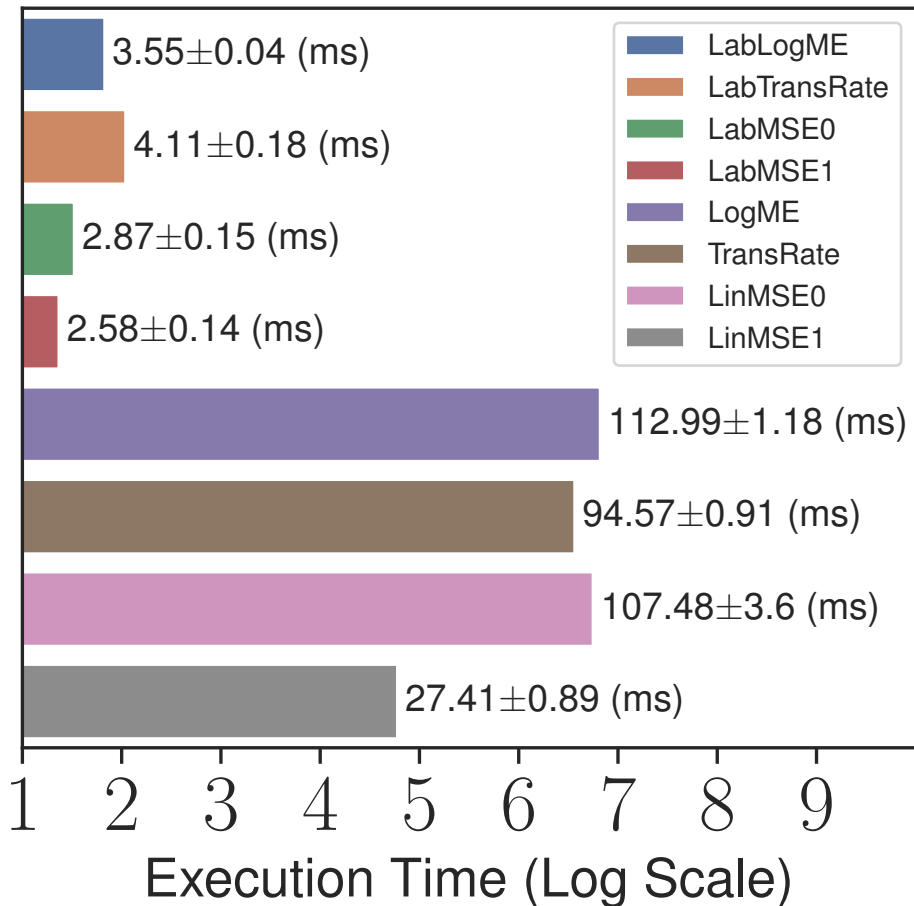

Supplement: supplementary_material [file attachment]

Method

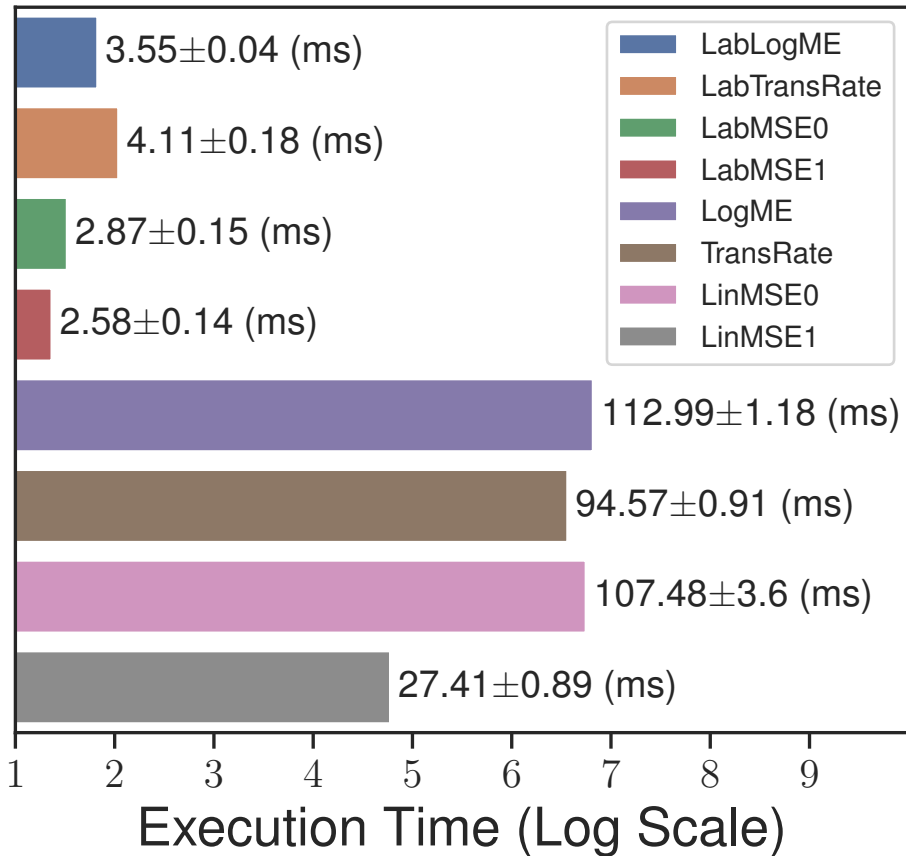

Supplement: supplementary_material [file attachment]

Transferred MSE

0.04

0.03

0.09

0.14

0.19

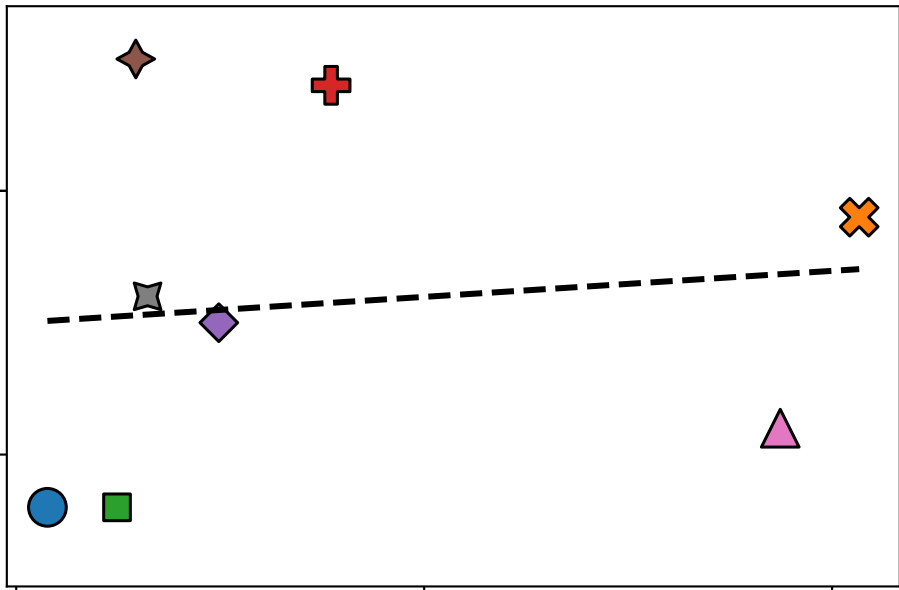

Supplement: supplementary_material [file attachment]

**corr=0.311, p<0.001**

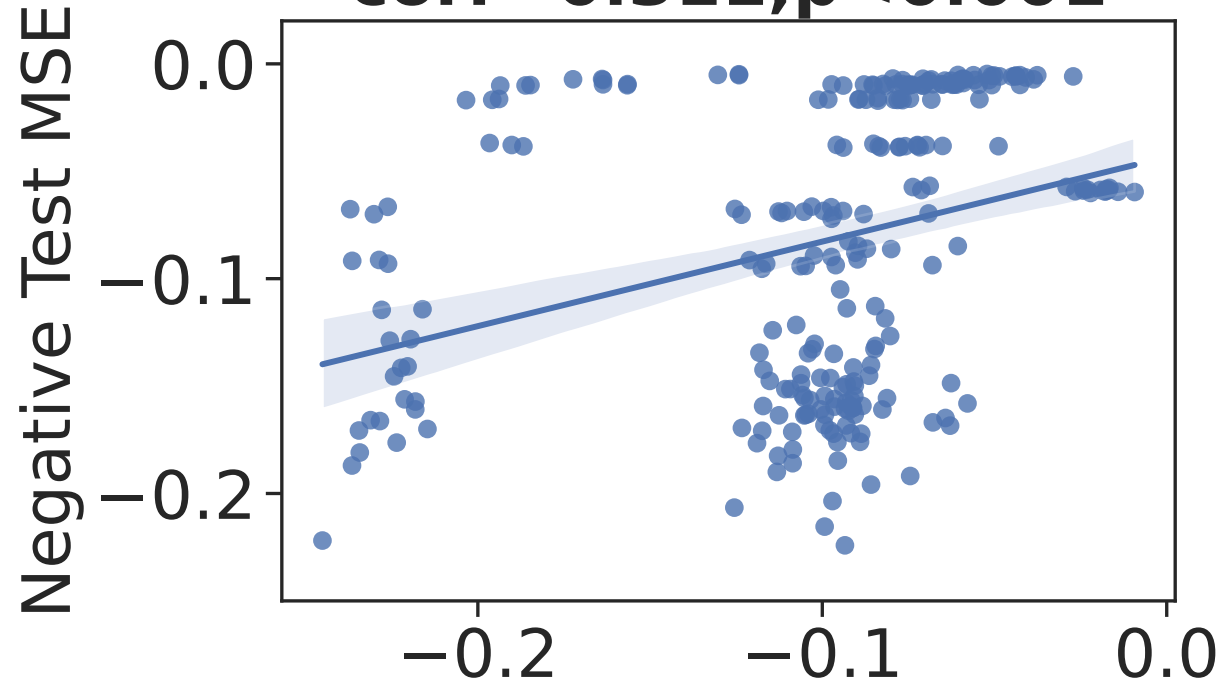

Supplement: supplementary_material [file attachment]

**corr=0.410,  $p<0.001$**

Negative Test MSE

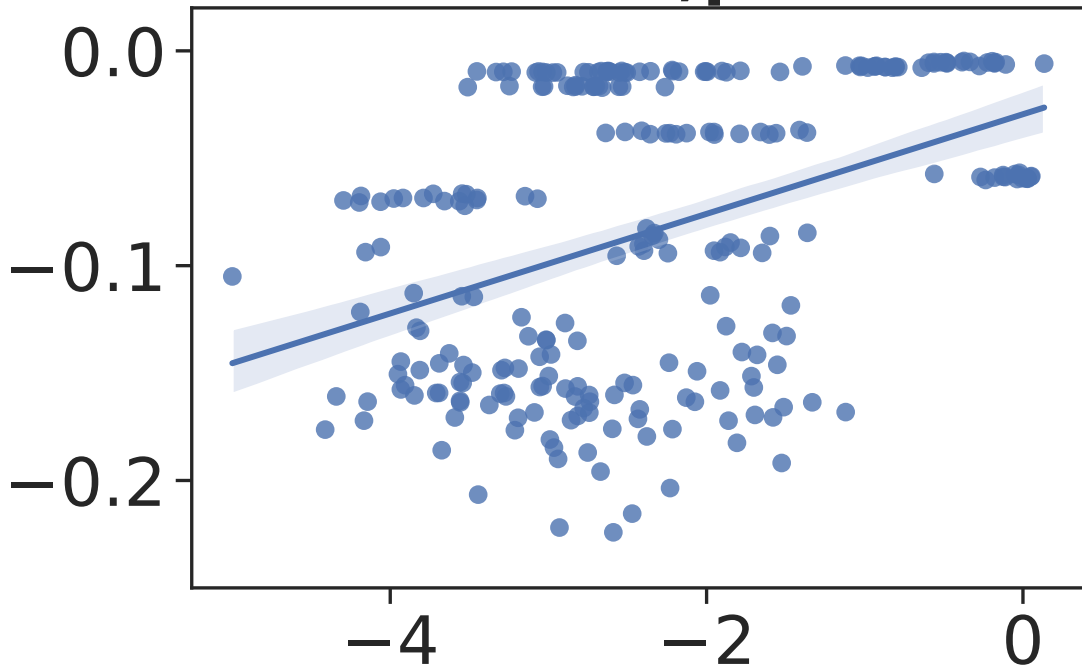

Supplement: supplementary_material [file attachment]

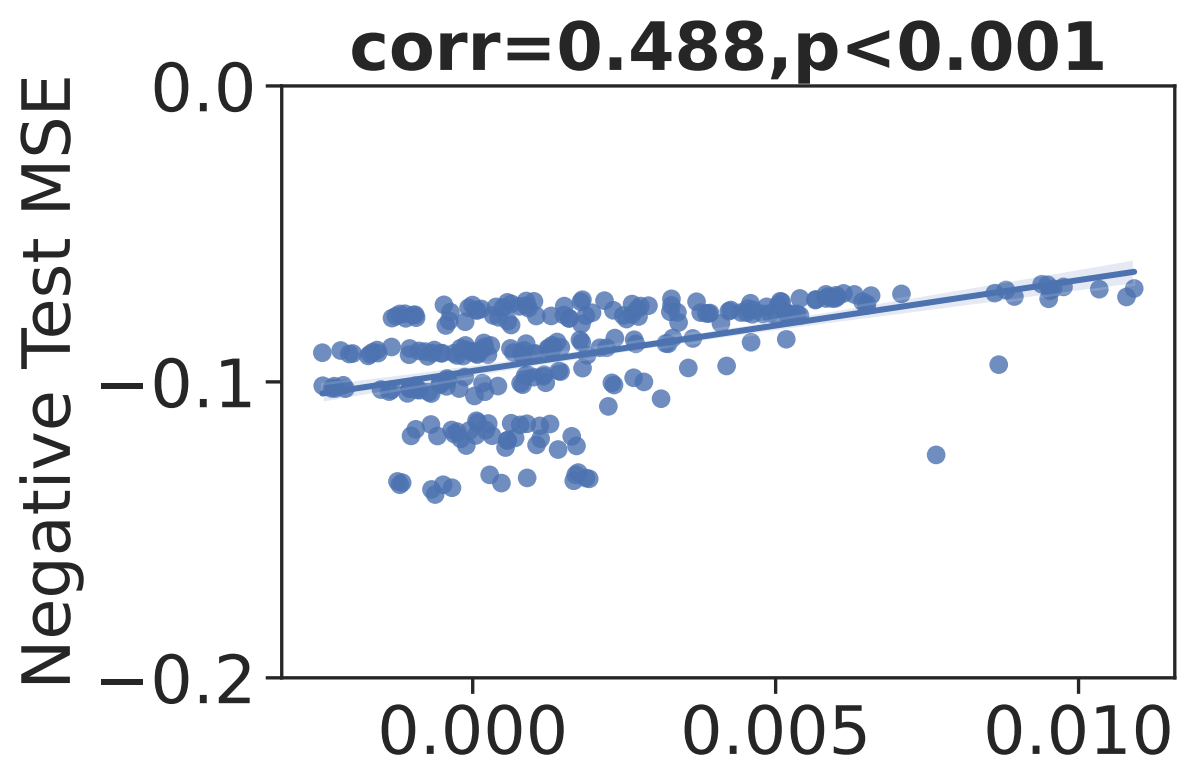

Supplement: supplementary_material [file attachment]

**corr=0.165, p=0.008**

Negative Test MSE

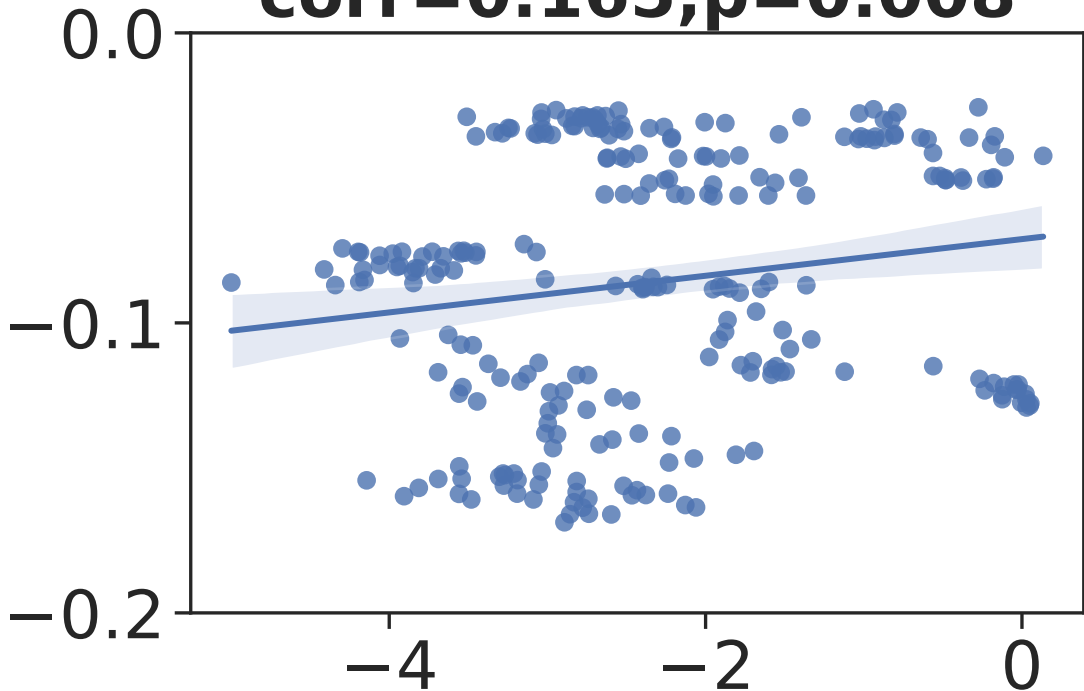

Supplement: supplementary_material [file attachment]

**corr=0.269,  $p<0.001$**

Transferred MSE

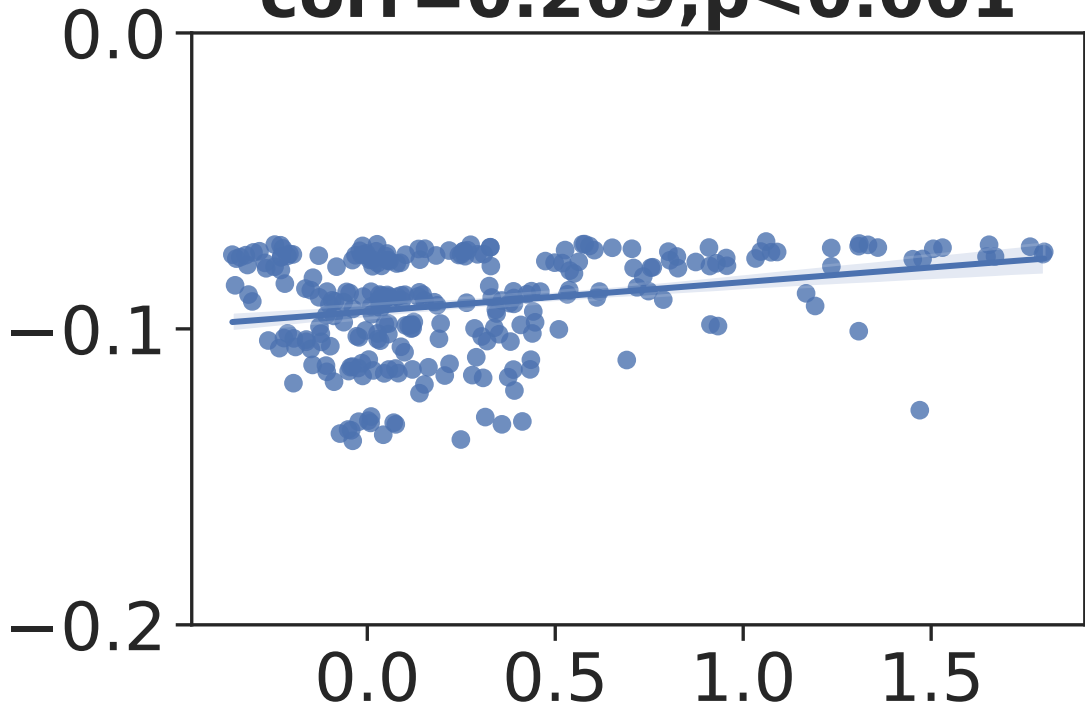

Supplement: supplementary_material [file attachment]

**corr=0.439,  $p < 0.001$**

Transferred MSE

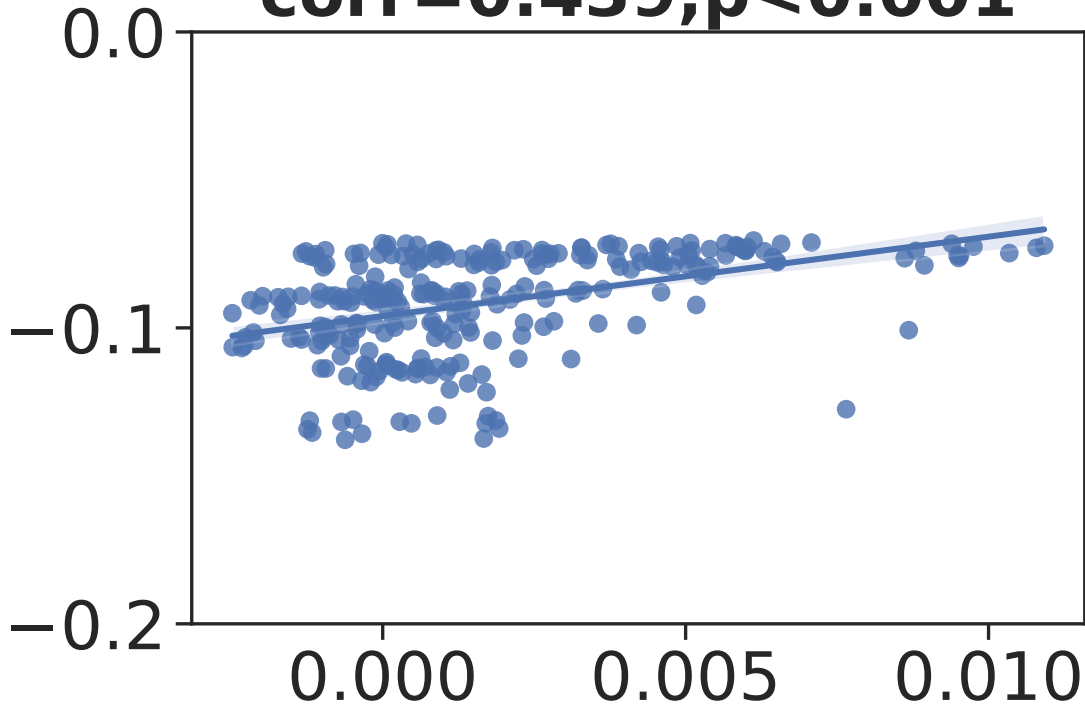

Supplement: supplementary_material [file attachment]
